# Supplementary material
Source: PubMed Central journal article supplement (PMC4755376)
Supplement: ejhg2015140x1.pdf [file ejhg2015140x1.pdf]

## Supplementary Information

In zebrafish, there are two orthologous loci (*LOC569603* and *LOC567670*) of the *HERC1* gene in human. The *LOC569603* locus shares higher nucleic acid conservation with the human *HERC1* (Overall 81,4%, Supplementary Figure 1a) than the *LOC567670* loci (overall 53% nucleic acid conservation, result not shown). Expression of both loci was examined by RT-PCR in the head and the body of zebrafish embryo 2 and 3 days post fertilization as well as in the head of the adult using 2 pairs of primers targeting the 5' and 3' end of the transcript. The expression of *LOC567670* was not detected at any stage of development, suggesting that this locus is not functional in zebrafish (result not shown). The expression of *LOC569603* can be detected only in the body of zebrafish embryo 3 days post fertilization (Supplementary Figure 1b), suggesting functional divergence between the human and the zebrafish protein.

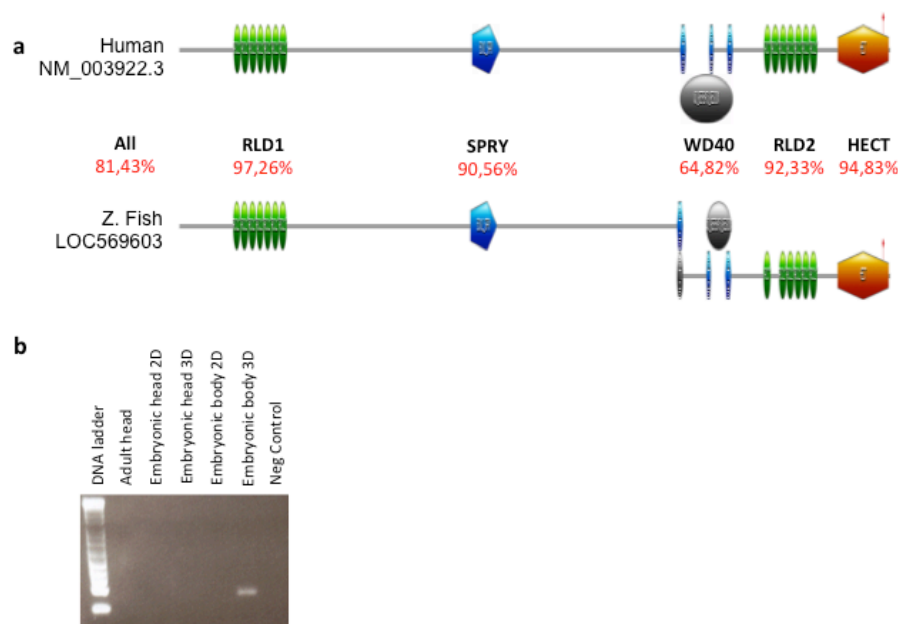

**Supplementary Figure 1:** Conservation and expression of *herc1* zebrafish ortholog. (a) Nucleic acid conservation between the human *HERC1* transcript (NM\_003922.3) and its zebrafish ortholog (*LOC569603*). Domain search was performed using Prosite (ExPASy), and pairwise comparison of the whole transcript or specific domain was done using Clustal Omega tool (EBI). (b) Expression of *LOC569603* is visible only in the embryonic body 3 days post fertilization. RT-PCR was performed using primers targeting the HECT domain of the human and zebrafish transcripts.
